# Supplementary material for: Enantiomers of 3-pentylbenzo[c]thiophen-1(3H)-one: preparation and evaluation of anti-ischemic stroke activities
Source: Royal Society of Chemistry journal article supplement (doi:10.1039/c6ra04251a), 2016-01-01

Supporting Information

**Enantiomers of 3-Pentylbenzo[c]thiophen-1(3H)-one: Preparation and  
Evaluation of Anti-Ischemic Stroke Activities**

Yanlin Jian,<sup>‡*a*</sup> Jing Ji,<sup>‡*b*</sup> Zhangjian Huang,<sup>‡*a*</sup> Yang Gao,<sup>*a*</sup> Xiao Sheng,<sup>*a*</sup> Wei Yin,<sup>*a*</sup> Dayong Zhang,<sup>*a*</sup>  
Huiji,<sup>*b*</sup> and YihuaZhang<sup>*a*</sup>

**Content:** some spectra of related compounds

|                                                                                                                                                                     |        |
|---------------------------------------------------------------------------------------------------------------------------------------------------------------------|--------|
| 1. <sup>1</sup> H, <sup>13</sup> C NMR, ESI-MS and ESI-HRMS spectra of representative compounds                                                                     | S2-15  |
| 1.1. <b>Figure 1.</b> Spectra of compound <b>9</b>                                                                                                                  | S2-3   |
| 1.2. <b>Figure 2.</b> Spectra of compound ( <i>S</i> )- <b>9</b>                                                                                                    | S4-5   |
| 1.3. <b>Figure 3.</b> Spectra of compound ( <i>R</i> )- <b>9</b>                                                                                                    | S6-7   |
| 1.4. <b>Figure 4.</b> Spectra of compound ( <i>S</i> )- <b>12</b>                                                                                                   | S8-9   |
| 1.5. <b>Figure 5.</b> Spectra of compound ( <i>R</i> )- <b>12</b>                                                                                                   | S10-11 |
| 1.6. <b>Figure 6.</b> Spectra of compound ( <i>S</i> )- <b>1</b>                                                                                                    | S12-13 |
| 1.7. <b>Figure 6.</b> Spectra of compound ( <i>R</i> )- <b>1</b>                                                                                                    | S14-15 |
| 2. HPLC spectra for the enantiomeric excess of ( <i>S</i> )- <b>and</b> ( <i>R</i> )- <b>1</b> prepared by chemical synthesis in combination with chiral resolution | S16-17 |
| 3. HPLC and EDC spectra of ( <i>S</i> )- and ( <i>R</i> )- <b>1</b> prepared by preparative HPLC chiral columns                                                     | S18-19 |

1.  $^1\text{H}$ ,  $^{13}\text{C}$  NMR, ESI-MS and ESI-HRMS spectra of (*S*)-**9**, (*R*)-**9**, (*S*)-**12**, (*R*)-**12**, (*S*)-**1**, (*R*)-**1**

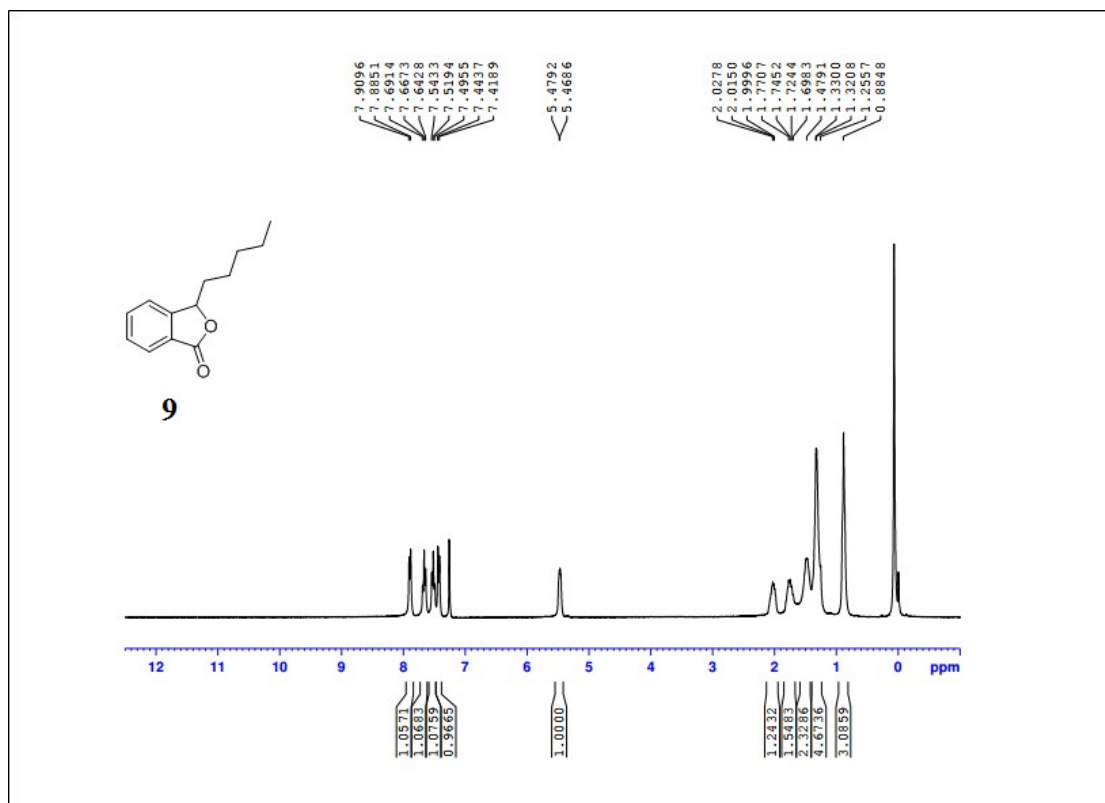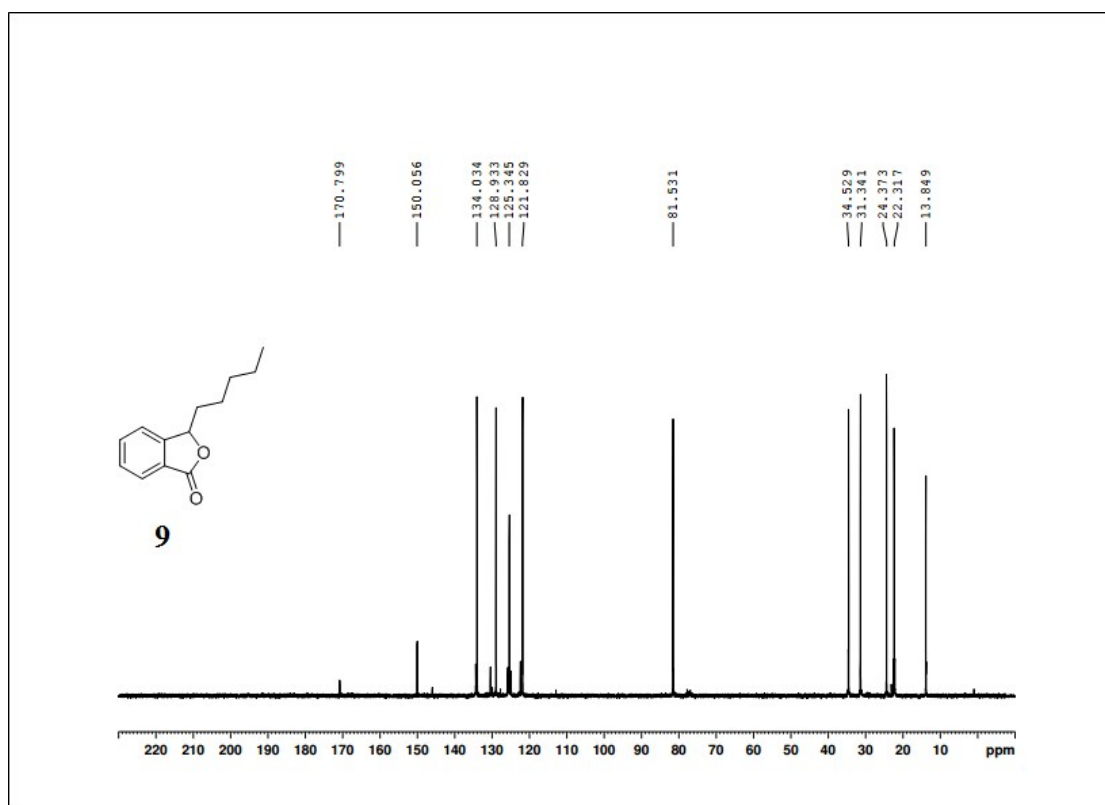

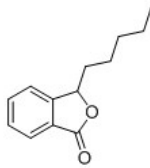

9

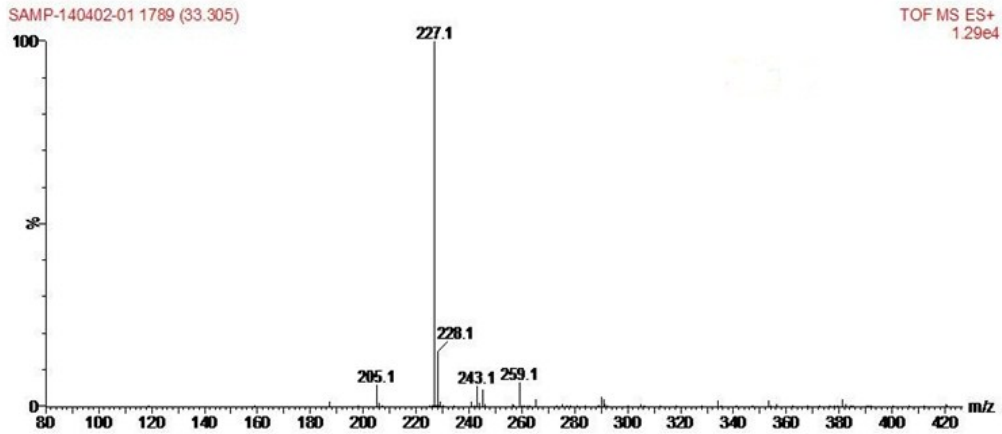

### Elemental Composition Report

Single Mass Analysis

Tolerance = 5.0 PPM / DBE: min = -1.5, max = 20.0

Selected filters: None

Monoisotopic Mass, Even Electron Ions

204 formula(e) evaluated with 1 results within limits (up to 50 best isotopic matches for each mass)

Elements Used:

C: 0-50 H: 0-100 N: 0-5 O: 0-5 Na: 0-1

9

SAMPLE-SAMP-184 422 (7.860)

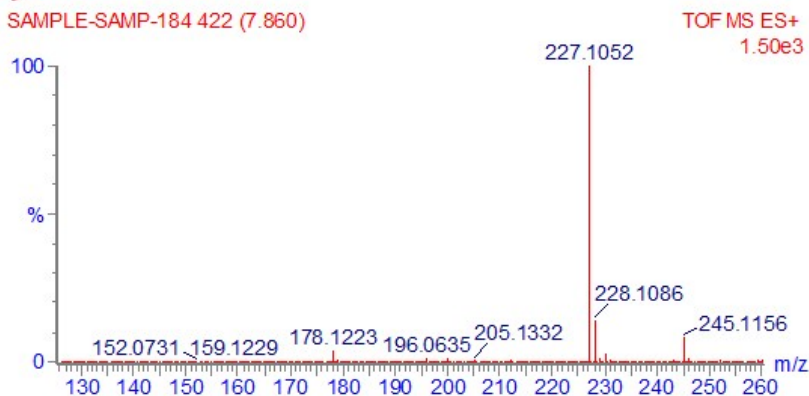

Minimum:

-1.5

Maximum:

5.0 5.0 20.0

| Mass     | Calc. Mass | mDa | PPM | DBE | i-FIT | Formula       |
|----------|------------|-----|-----|-----|-------|---------------|
| 227.1052 | 227.1048   | 0.4 | 1.8 | 5.5 | 1.3   | C13 H16 O2 Na |

Figure 1. Spectra of compound 9

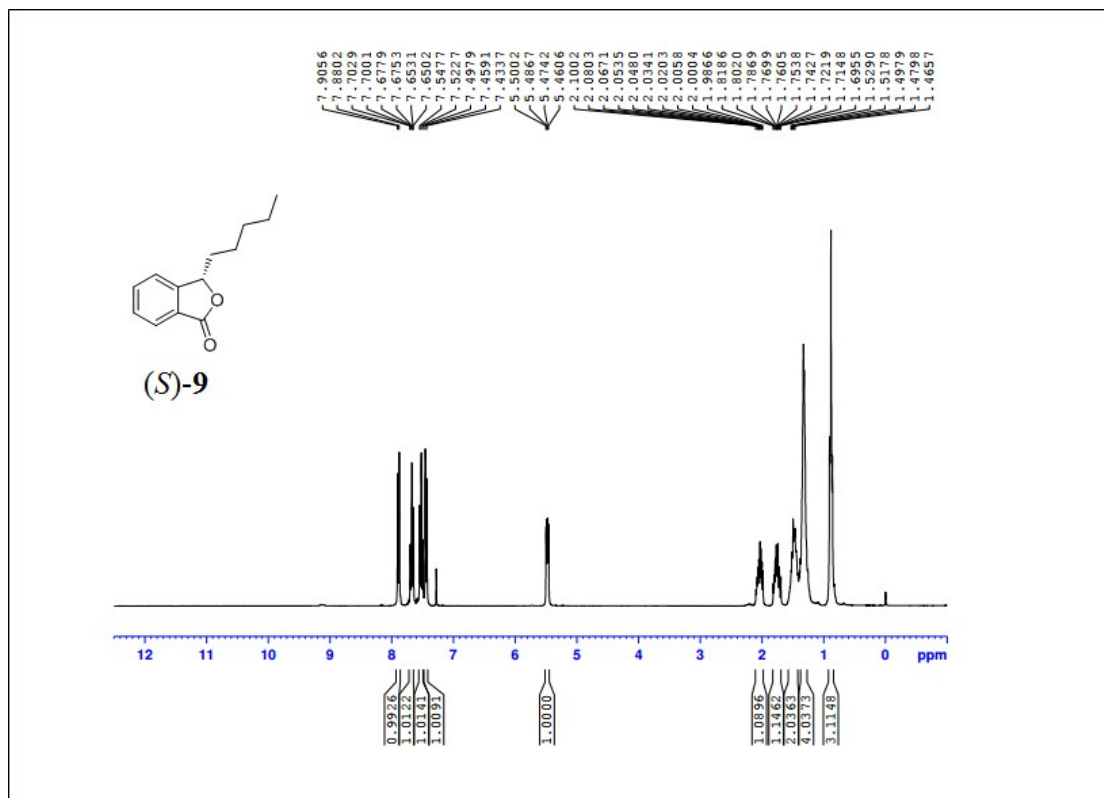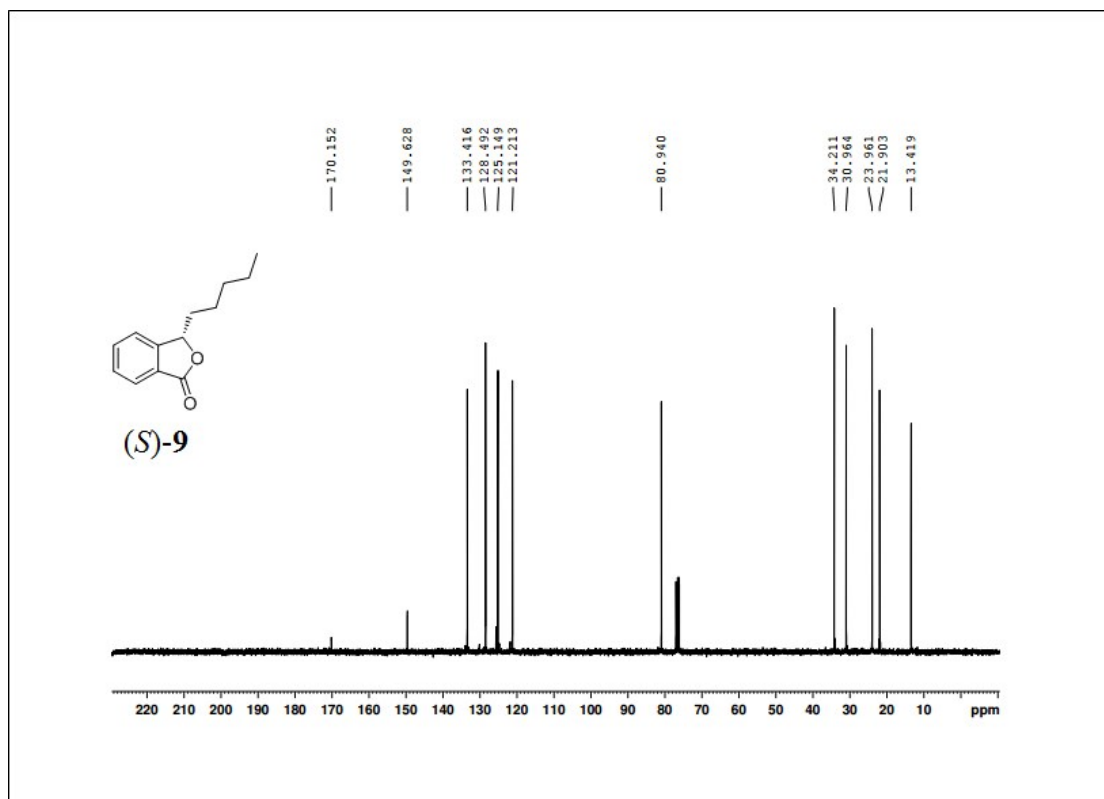

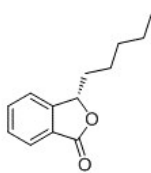

(S)-9

S-9

SAMPLE-SAMP-164 188 (3.492)

TOF MS ES+  
1.11e4

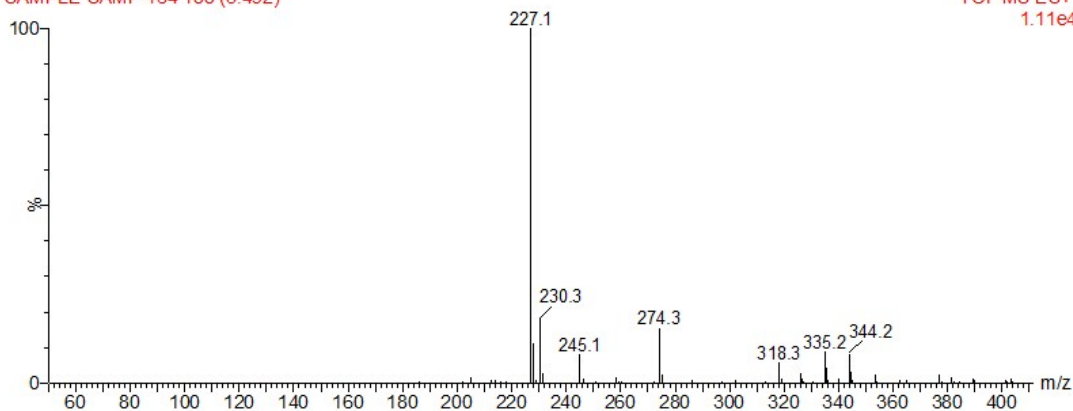

### Elemental Composition Report

#### Single Mass Analysis

Tolerance = 5.0 PPM / DBE: min = -1.5, max = 20.0

Selected filters: None

Monoisotopic Mass, Even Electron Ions

204 formula(e) evaluated with 1 results within limits (up to 50 best isotopic matches for each mass)

Elements Used:

C: 0-50 H: 0-100 N: 0-5 O: 0-5 Na: 0-1

S-9

SAMPLE-SAMP-164 188 (3.492)

TOF MS ES+  
1.11e4

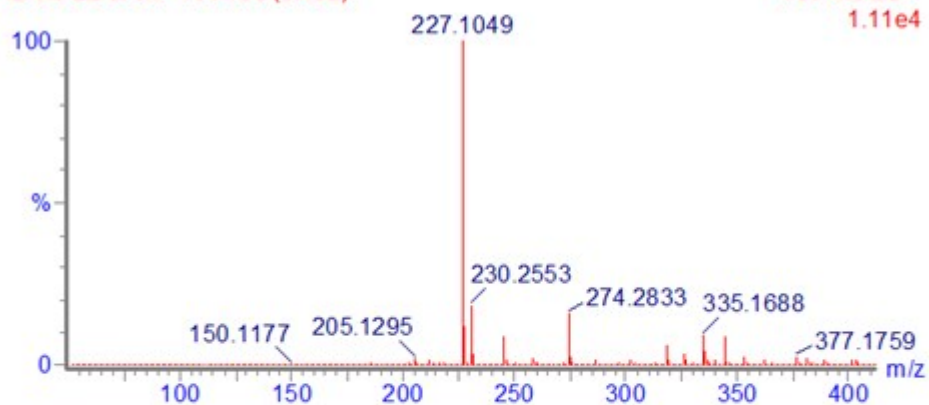

Minimum:

-1.5

Maximum:

5.0 5.0 20.0

| Mass     | Calc. Mass | mDa | PPM | DBE | i-FIT | Formula       |
|----------|------------|-----|-----|-----|-------|---------------|
| 227.1049 | 227.1048   | 0.1 | 0.4 | 5.5 | 72.4  | C13 H16 O2 Na |

Figure 2. Spectra of compound (S)-9

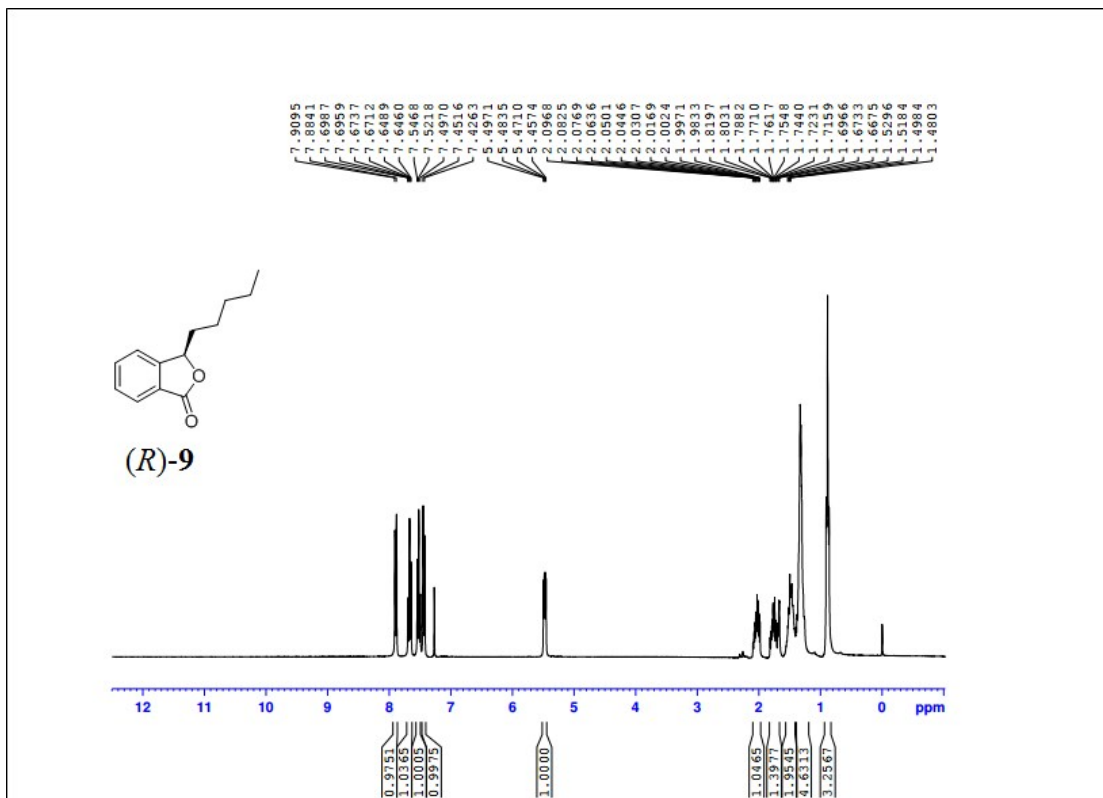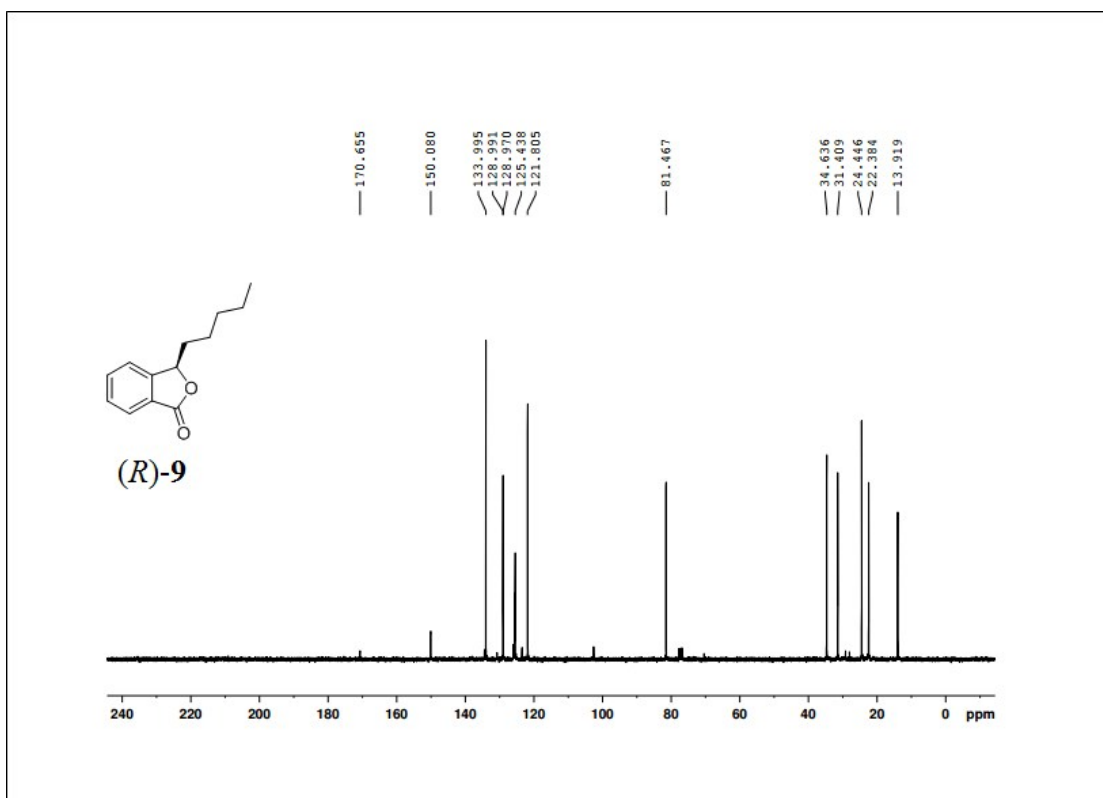

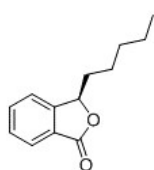

(R)-9

R-9

SAMPLE-SAMP-164 50 (0.926)

TOF MS ES+  
1.35e4

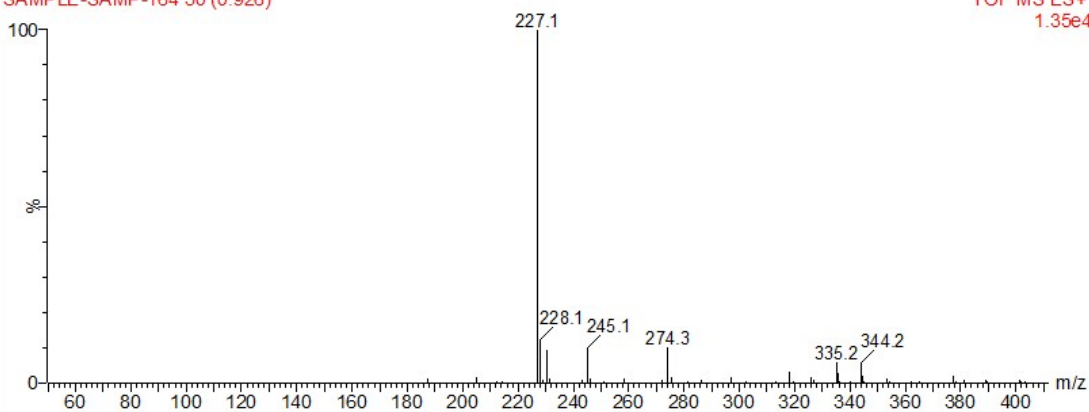

### Elemental Composition Report

#### Single Mass Analysis

Tolerance = 5.0 PPM / DBE: min = -1.5, max = 20.0

Selected filters: None

Monoisotopic Mass, Even Electron Ions

204 formula(e) evaluated with 1 results within limits (up to 50 best isotopic matches for each mass)

Elements Used:

C: 0-50 H: 0-100 N: 0-5 O: 0-5 Na: 0-1

R-9

SAMPLE-SAMP-164 50 (0.926)

TOF MS ES+  
1.35e4

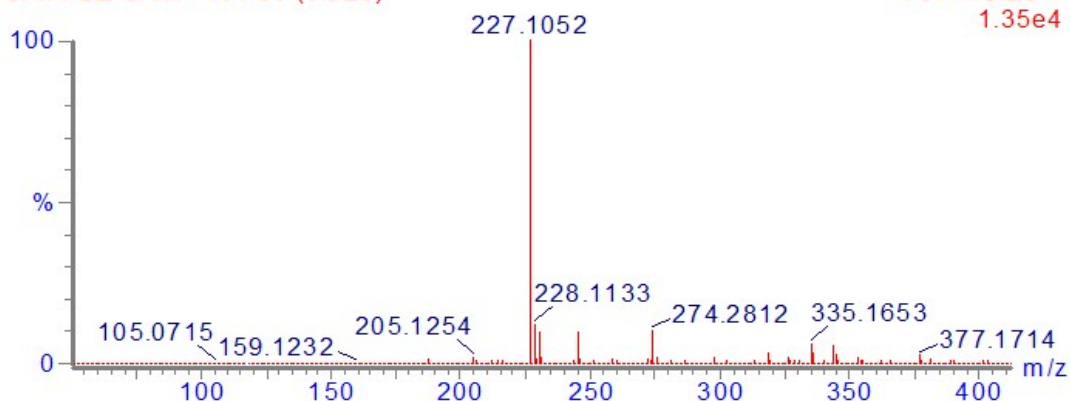

Minimum:

-1.5

Maximum:

5.0 5.0 20.0

| Mass     | Calc. Mass | mDa | PPM | DBE | i-FIT | Formula       |
|----------|------------|-----|-----|-----|-------|---------------|
| 227.1052 | 227.1048   | 0.4 | 1.8 | 5.5 | 39.7  | C13 H16 O2 Na |

Figure 3. Spectra of compound (R)-9

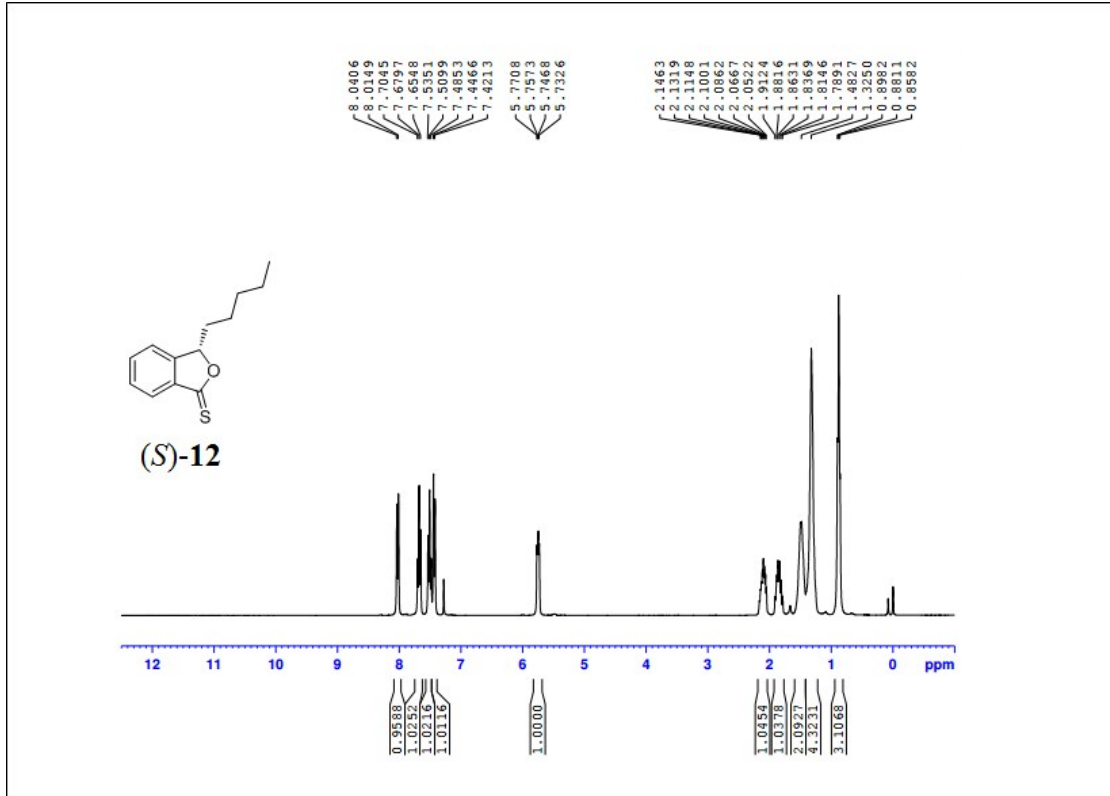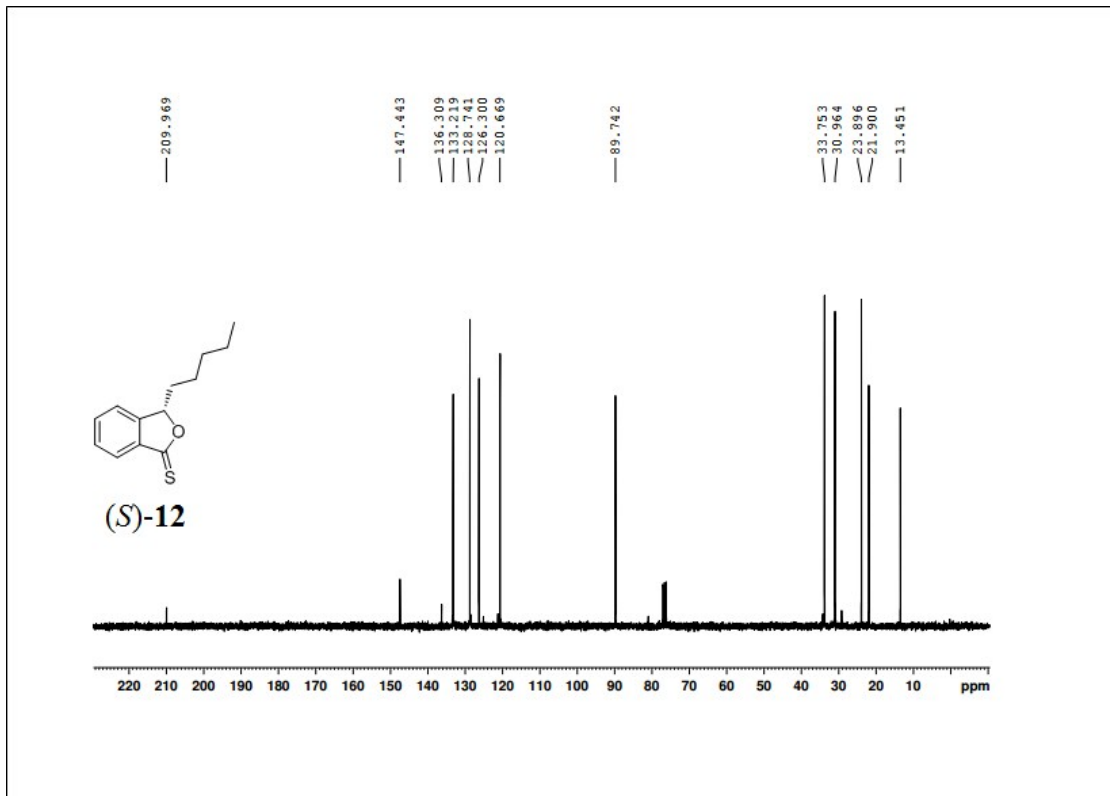



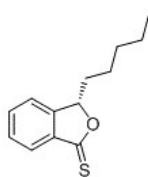

**(S)-12**

**S-12**

SAMPLE-SAMP-163 714 (13.265)

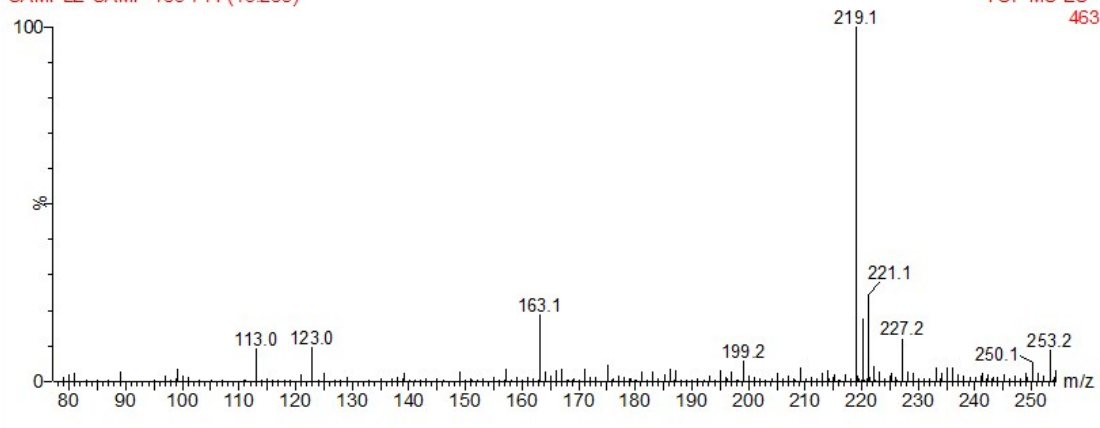

**Elemental Composition Report**

Single Mass Analysis

Tolerance = 5.0 PPM / DBE: min = -1.5, max = 20.0

Selected filters: None

Monoisotopic Mass, Even Electron Ions

198 formula(e) evaluated with 1 results within limits (up to 50 best isotopic matches for each mass)

Elements Used:

C: 0-50 H: 0-100 N: 0-5 O: 0-5 S: 0-1

**S-12**

SAMPLE-SAMP-163 714 (13.265)

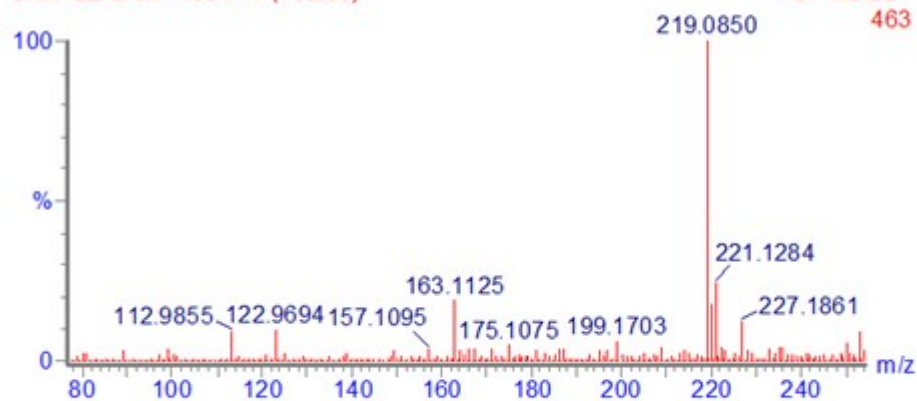

Minimum:

-1.5

Maximum:

5.0 5.0 20.0

| Mass     | Calc. Mass | mDa | PPM | DBE | i-FIT     | Formula     |
|----------|------------|-----|-----|-----|-----------|-------------|
| 219.0850 | 219.0844   | 0.6 | 2.7 | 6.5 | 2773158.3 | C13 H15 O S |

**Figure 4.** Spectra of compound (S)-12

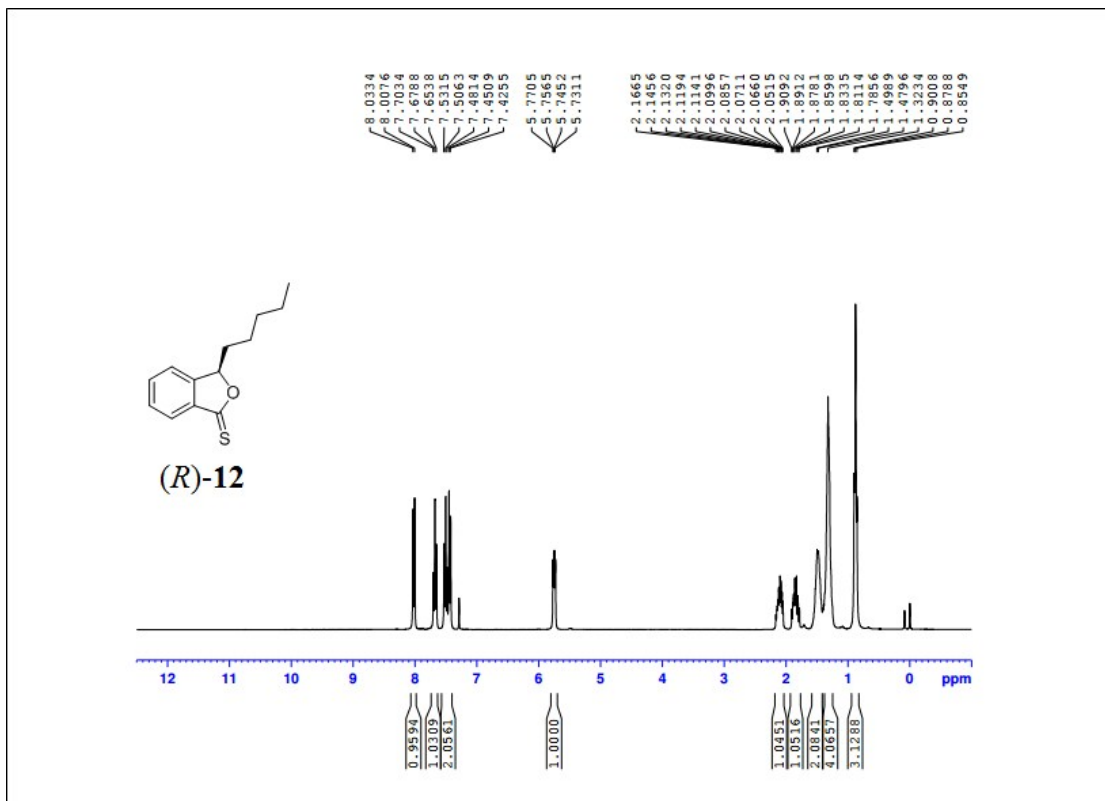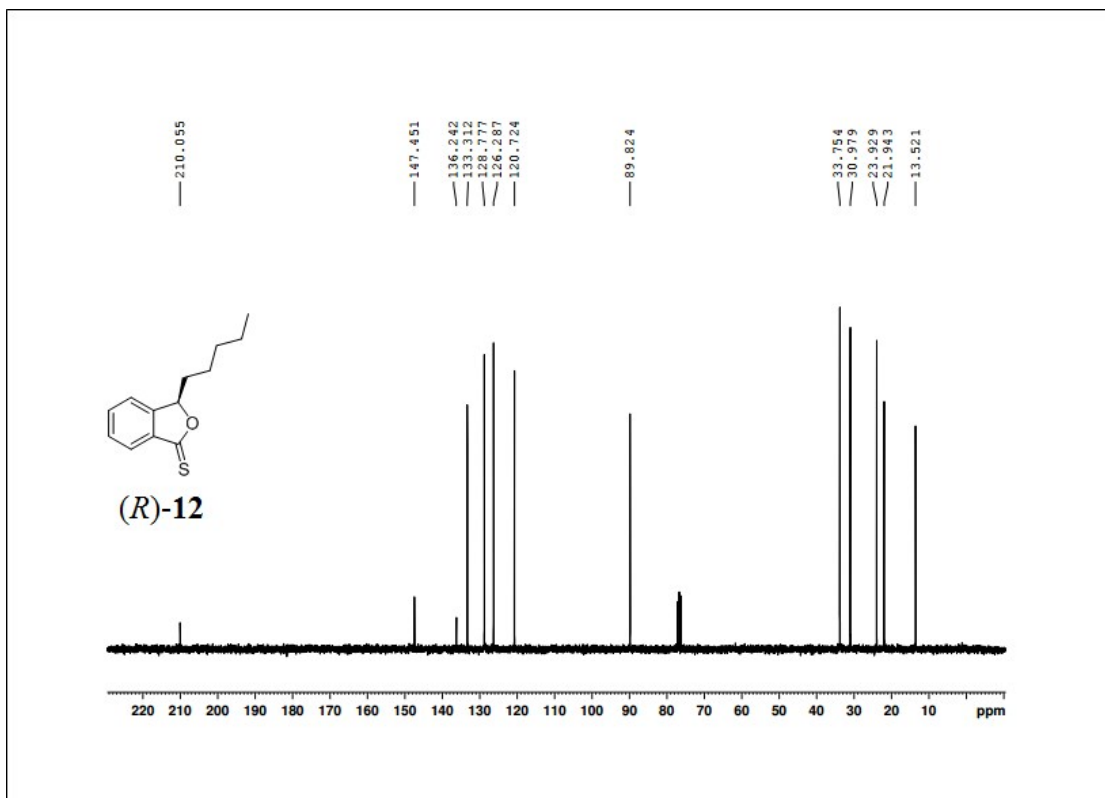

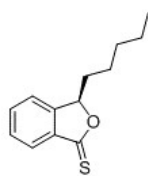

**(R)-12**

**R-12**

SAMPLE-SAMP-163 574 (10.664)

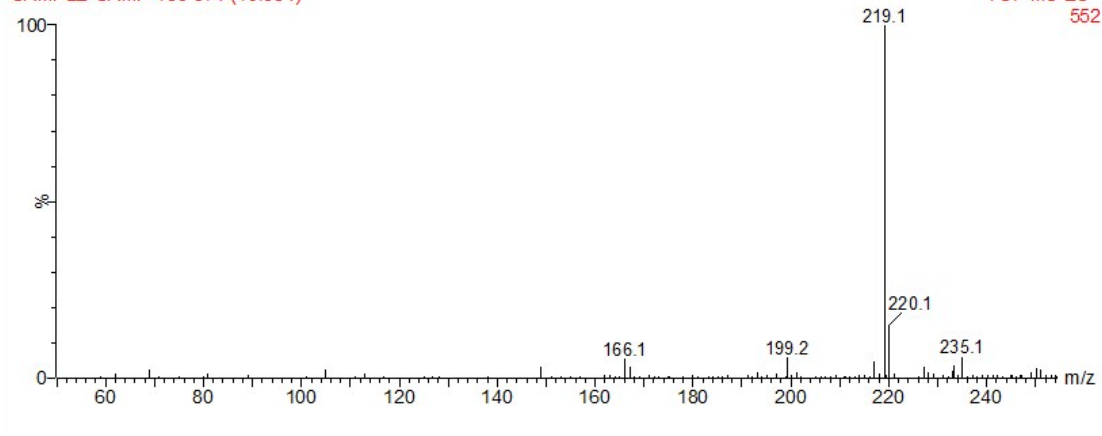

**Elemental Composition Report**

**Single Mass Analysis**

Tolerance = 5.0 PPM / DBE: min = -1.5, max = 20.0

Selected filters: None

Monoisotopic Mass, Even Electron Ions

198 formula(e) evaluated with 1 results within limits (up to 50 best isotopic matches for each mass)

Elements Used:

C: 0-50 H: 0-100 N: 0-5 O: 0-5 S: 0-1

**R-12**

SAMPLE-SAMP-163 574 (10.664)

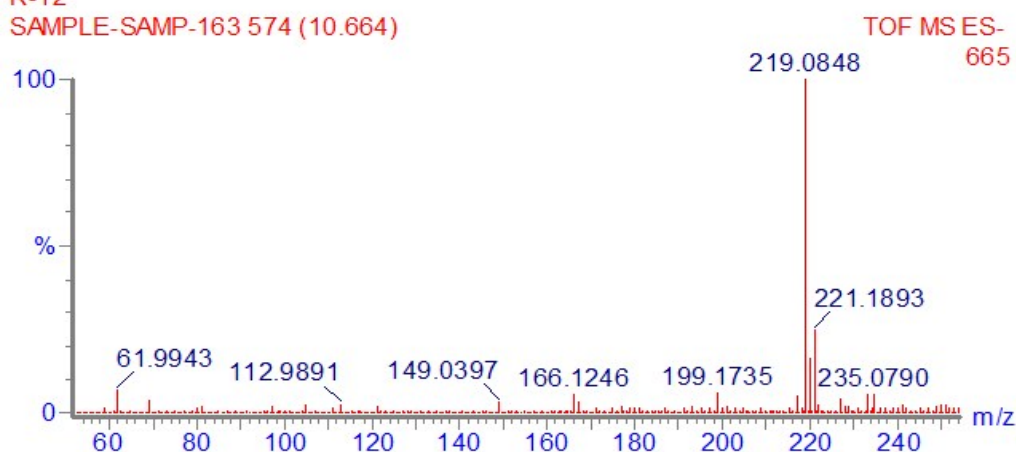

Minimum:

-1.5

Maximum:

5.0 5.0 20.0

| Mass     | Calc. Mass | mDa | PPM | DBE | i-FIT     | Formula                             |
|----------|------------|-----|-----|-----|-----------|-------------------------------------|
| 219.0848 | 219.0844   | 0.4 | 1.8 | 6.5 | 2773253.5 | C <sub>13</sub> H <sub>15</sub> O S |

**Figure 5.** Spectra of compound (R)-12

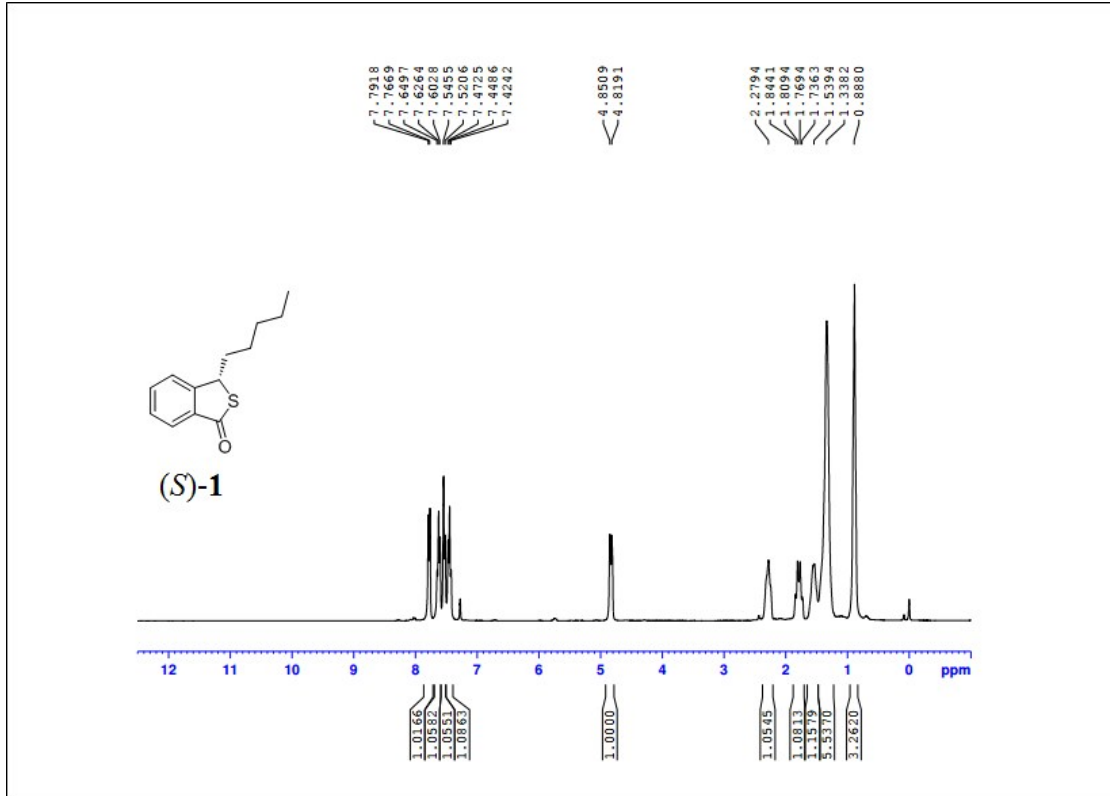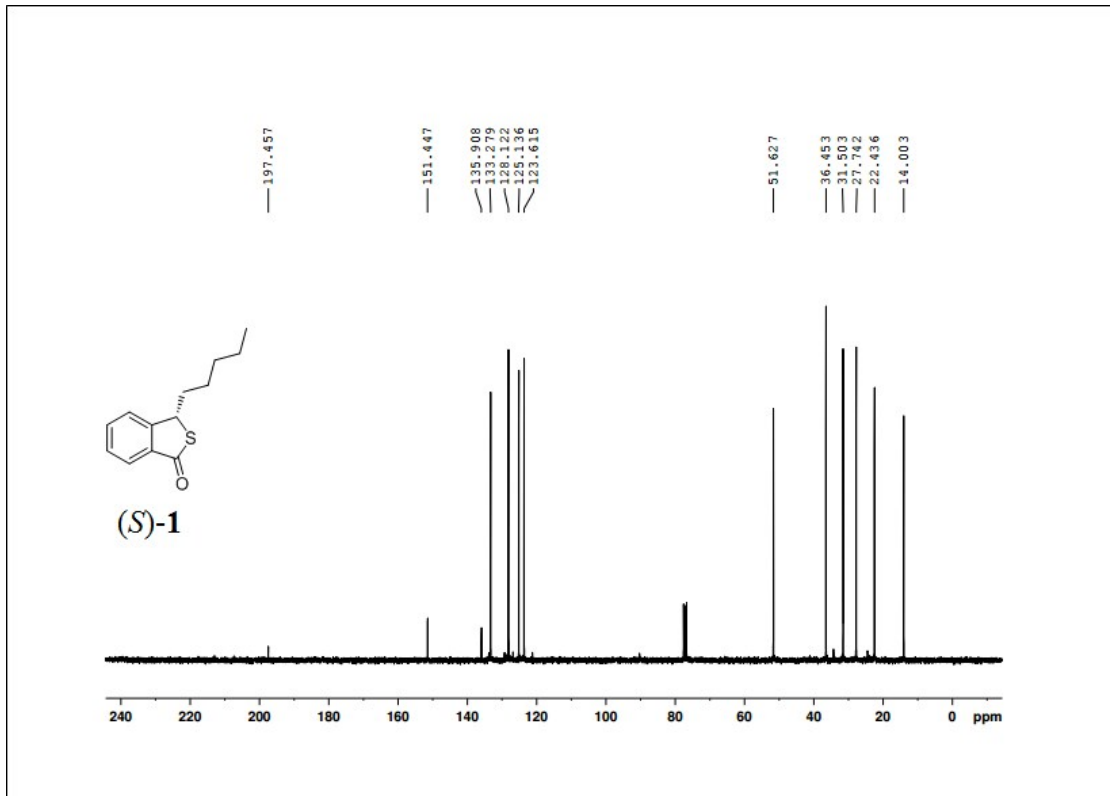

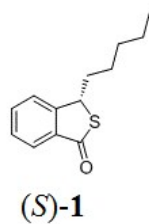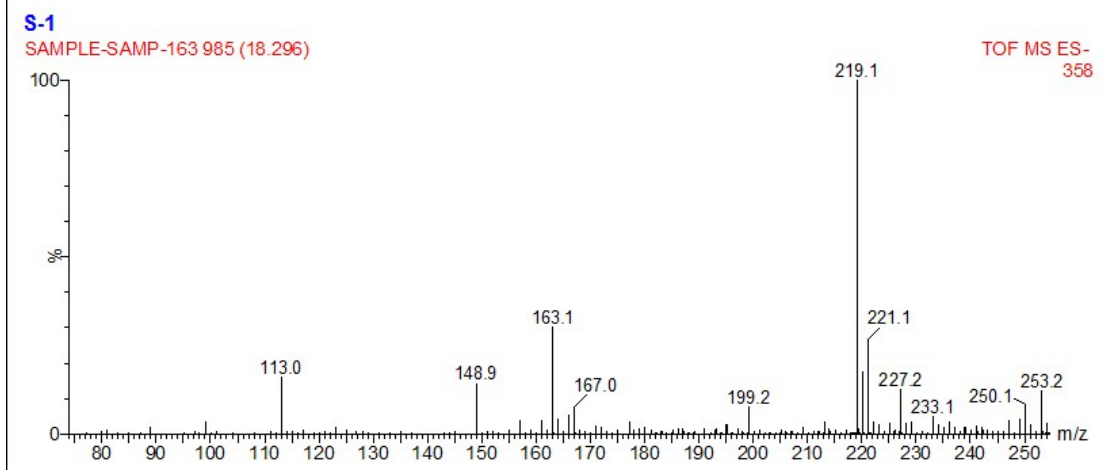

**Elemental Composition Report**

**Single Mass Analysis**

Tolerance = 5.0 PPM / DBE: min = -1.5, max = 20.0

Selected filters: None

Monoisotopic Mass, Even Electron Ions

198 formula(e) evaluated with 1 results within limits (up to 50 best isotopic matches for each mass)

Elements Used:

C: 0-50 H: 0-100 N: 0-5 O: 0-5 S: 0-1

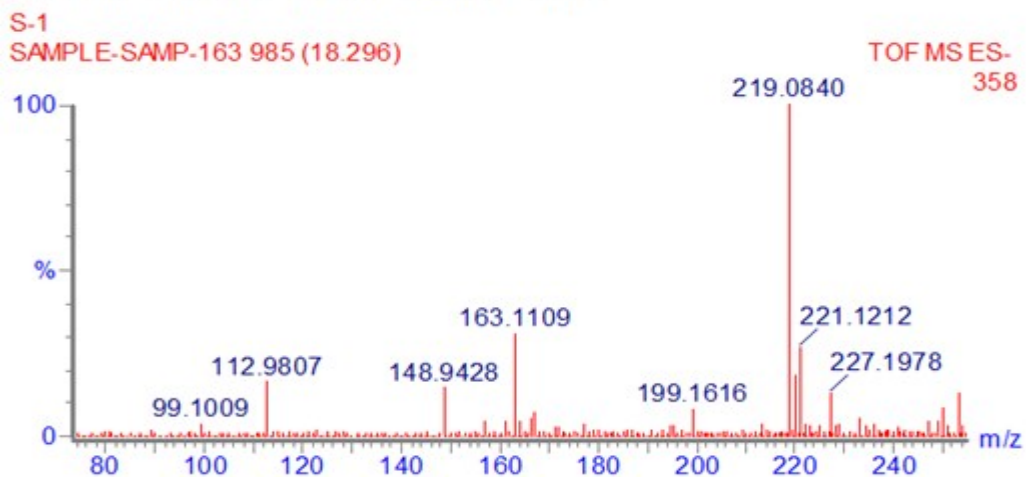

Minimum:

-1.5

Maximum:

5.0 5.0 20.0

| Mass     | Calc. Mass | mDa  | PPM  | DBE | i-FIT     | Formula                             |
|----------|------------|------|------|-----|-----------|-------------------------------------|
| 219.0840 | 219.0844   | -0.4 | -1.8 | 6.5 | 2773110.5 | C <sub>13</sub> H <sub>15</sub> O S |

**Figure 6.** Spectra of compound (S)-1

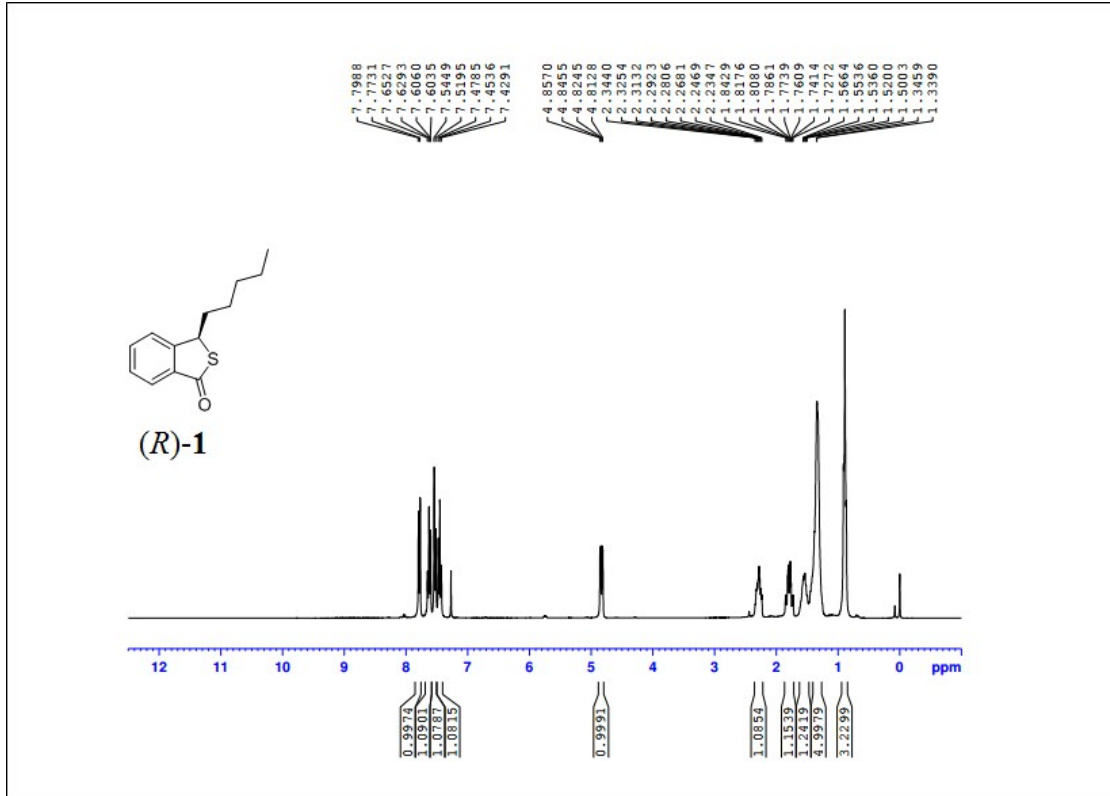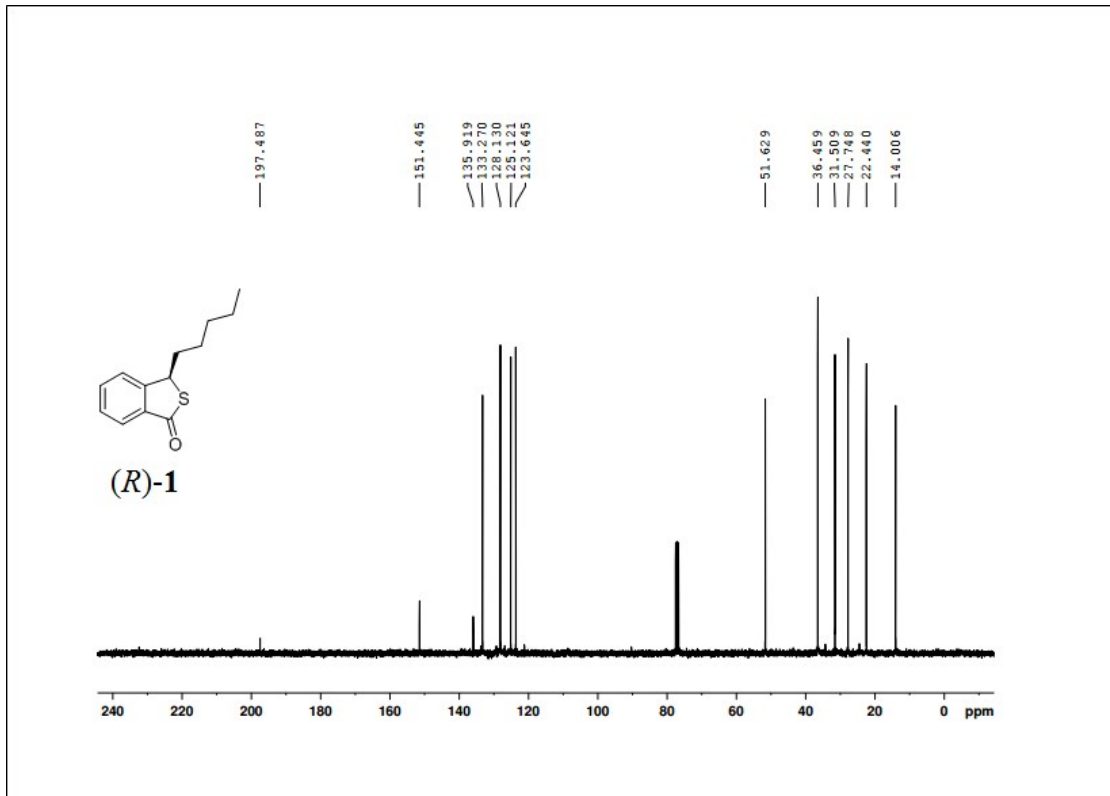



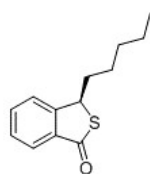

(R)-1

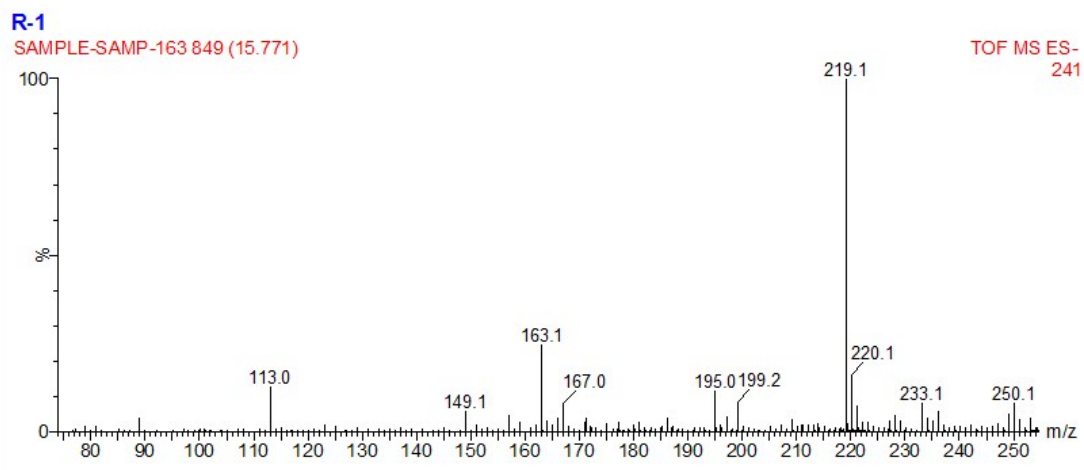

Elemental Composition Report

Single Mass Analysis

Tolerance = 5.0 PPM / DBE: min = -1.5, max = 20.0

Selected filters: None

Monoisotopic Mass, Even Electron Ions

198 formula(e) evaluated with 1 results within limits (up to 50 best isotopic matches for each mass)

Elements Used:

C: 0-50 H: 0-100 N: 0-5 O: 0-5 S: 0-1

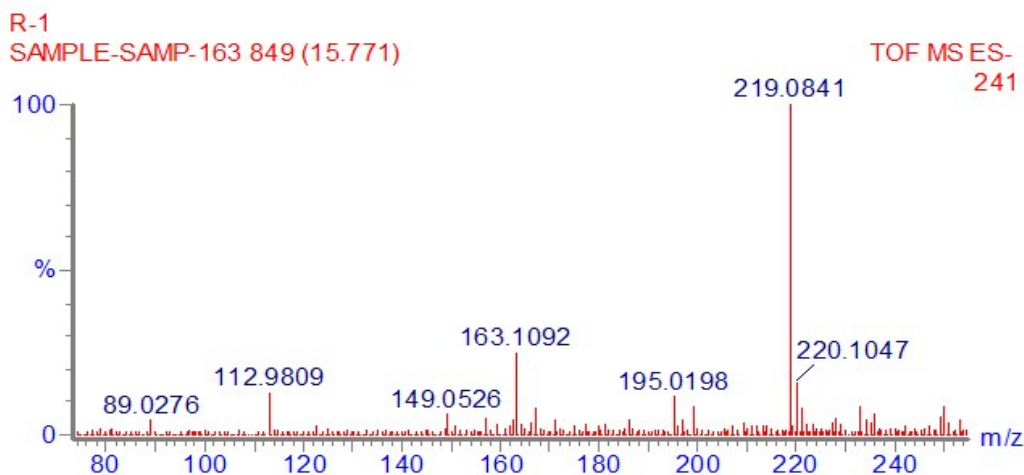

Minimum:

-1.5

Maximum:

5.0 5.0 20.0

| Mass     | Calc. Mass | mDa  | PPM  | DBE | i-FIT | Formula                             |
|----------|------------|------|------|-----|-------|-------------------------------------|
| 219.0841 | 219.0844   | -0.3 | -1.4 | 6.5 | 1.3   | C <sub>13</sub> H <sub>15</sub> O S |

Figure 7. Spectra of compound (R)-1

2. HPLC spectra for the enantiomeric excess of (*S*)-**1** and (*R*)-**1** prepared by chemical synthesis in combination with chiral resolution

2.1. (*S*)-3-pentylbenzo[*c*]thiophen-1(3*H*)-one ((*S*)-**1**). 94.4% ee. HPLC: chiralpak AD-H column (0.46 cm I.D. × 25 cm L × 5 μm); detected at 254 nm; n-hexane/EtOH/diethylamine = 98/2/0.1 (v/v/v); flow = 1.0 mL/min; retention time: 8.6 min (*R*), 10.6 min (*S*).

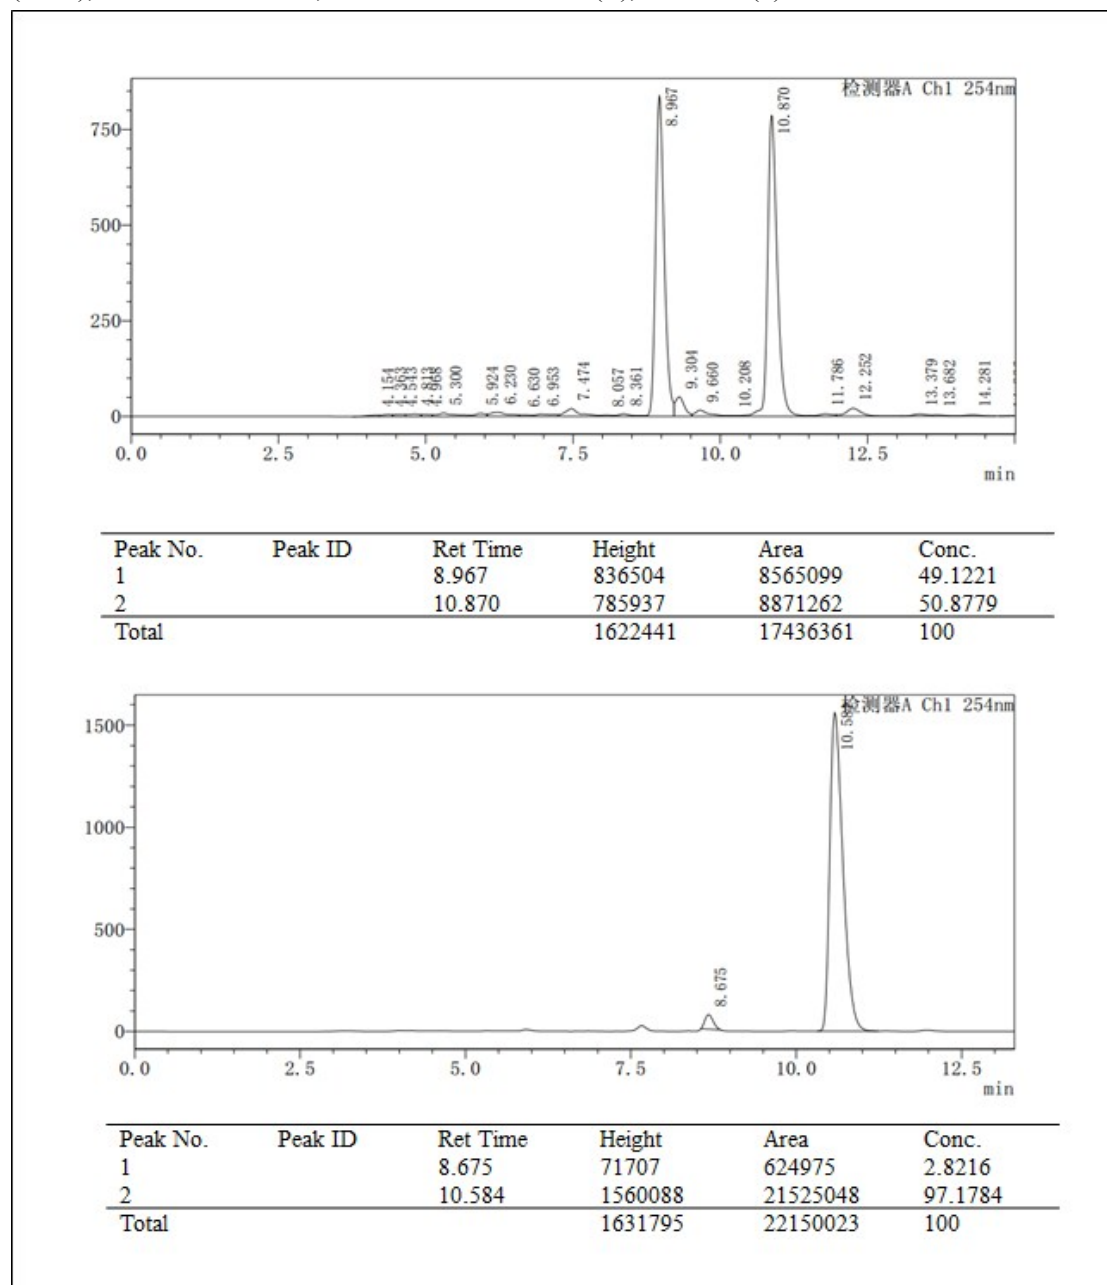



2.2. (*R*)-3-pentylbenzo[*c*]thiophen-1(3*H*)-one ((*R*)-**1**). 91.8% ee. HPLC: chiralpak AD-H column (0.46 cm I.D. × 25 cm L × 5 μm); detected at 254 nm; n-hexane/EtOH/diethylamine = 98/2/0.1 (v/v/v); flow = 1.0 mL/min; retention time: 7.4 min (*R*), 9.1 min (*S*).

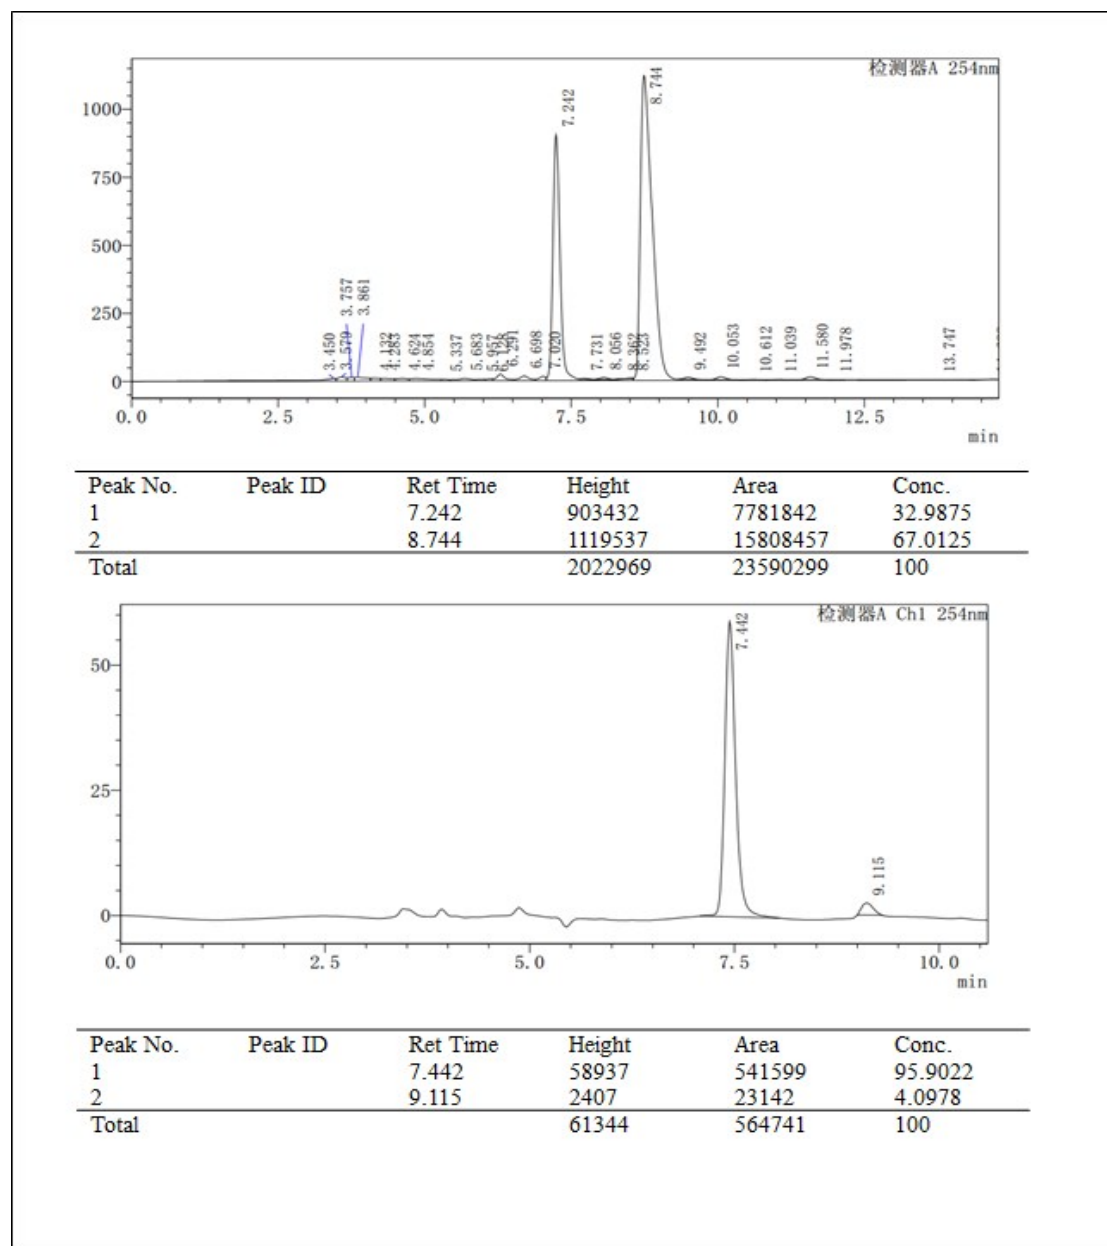

### 3. HPLC and EDC spectra of (*S*)- and (*R*)-**1** prepared by preparative HPLC chiral columns

3.1. (*S*)-3-pentylbenzo[*c*]thiophen-1(3*H*)-one ((*S*)-**1**). 99.3% ee. HPLC: chiralpak AD-H column (0.46 cm I.D. × 25 cm L × 5 μm); detected at 254 nm; n-hexane/EtOH/diethylamine = 98/2/0.1 (v/v/v); flow = 1.0 mL/min; retention time: 4.2 min (*R*), 5.1 min (*S*).

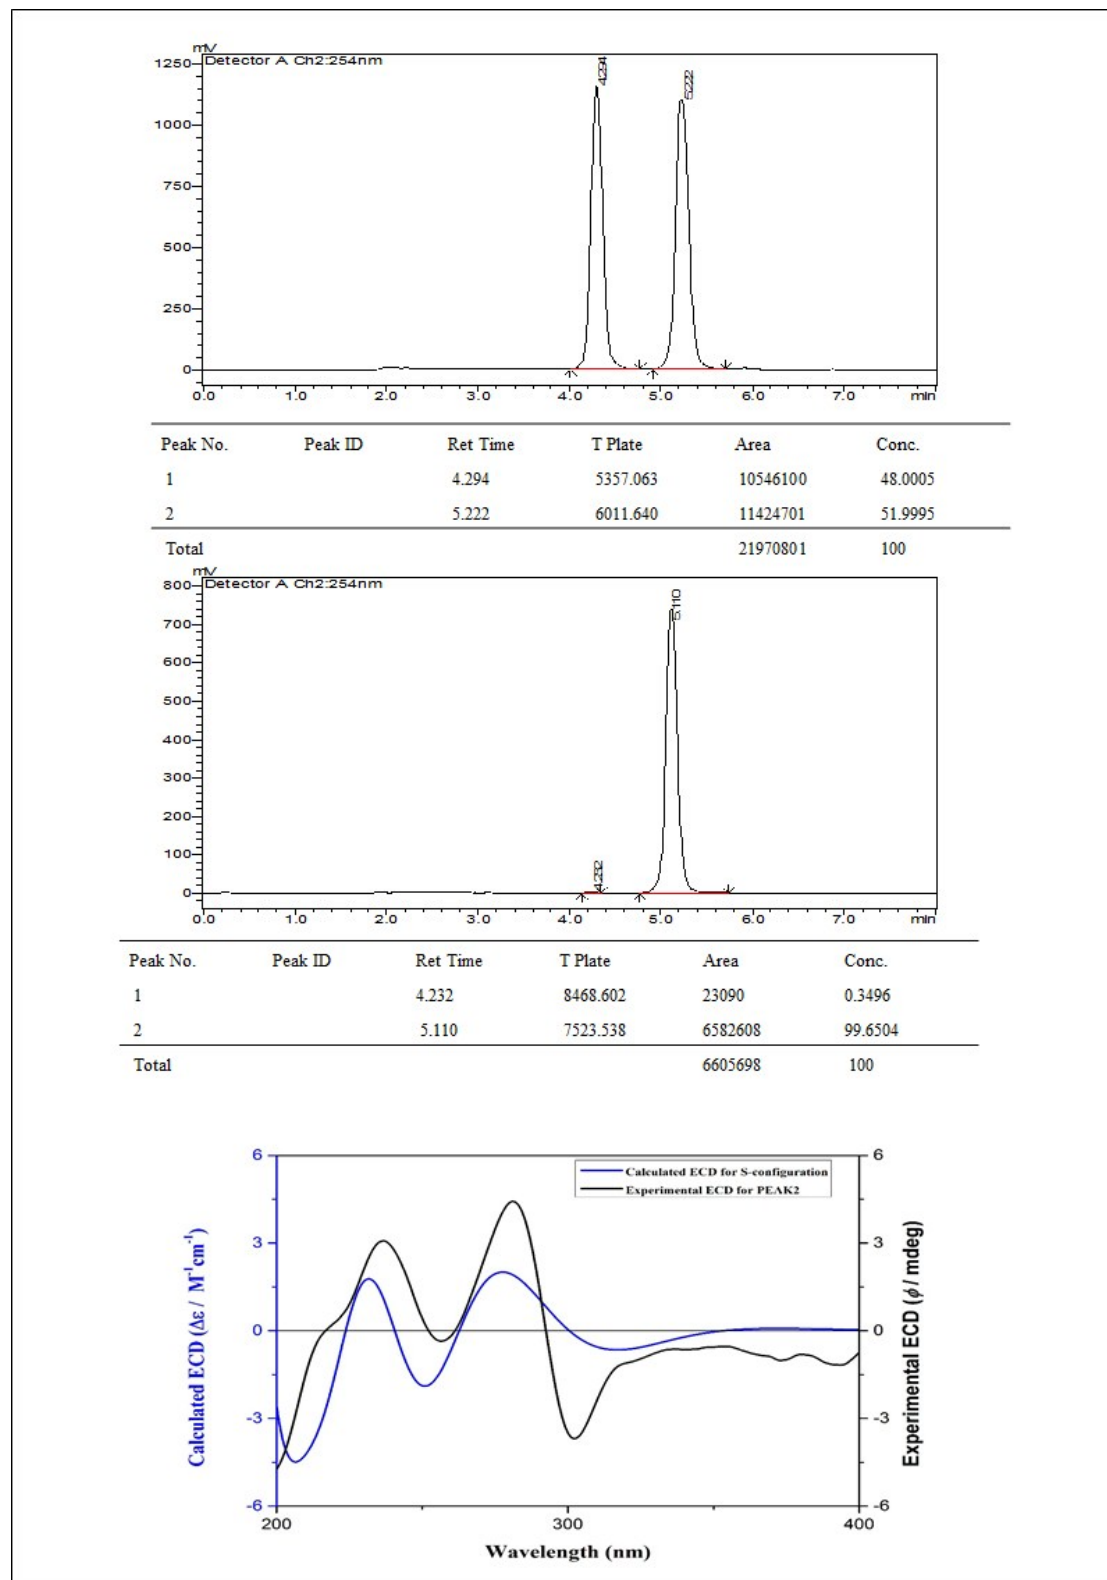

3.2. (*R*)-3-pentylbenzo[*c*]thiophen-1(3*H*)-one ((*R*)-**1**). 99.2% ee. HPLC: chiralpak AD-H column (0.46 cm I.D. × 25 cm L × 5 μm); detected at 254 nm; n-hexane/EtOH/diethylamine = 98/2/0.1 (v/v/v); flow = 1.0 mL/min; retention time: 4.2 min (*R*), 5.2 min (*S*).

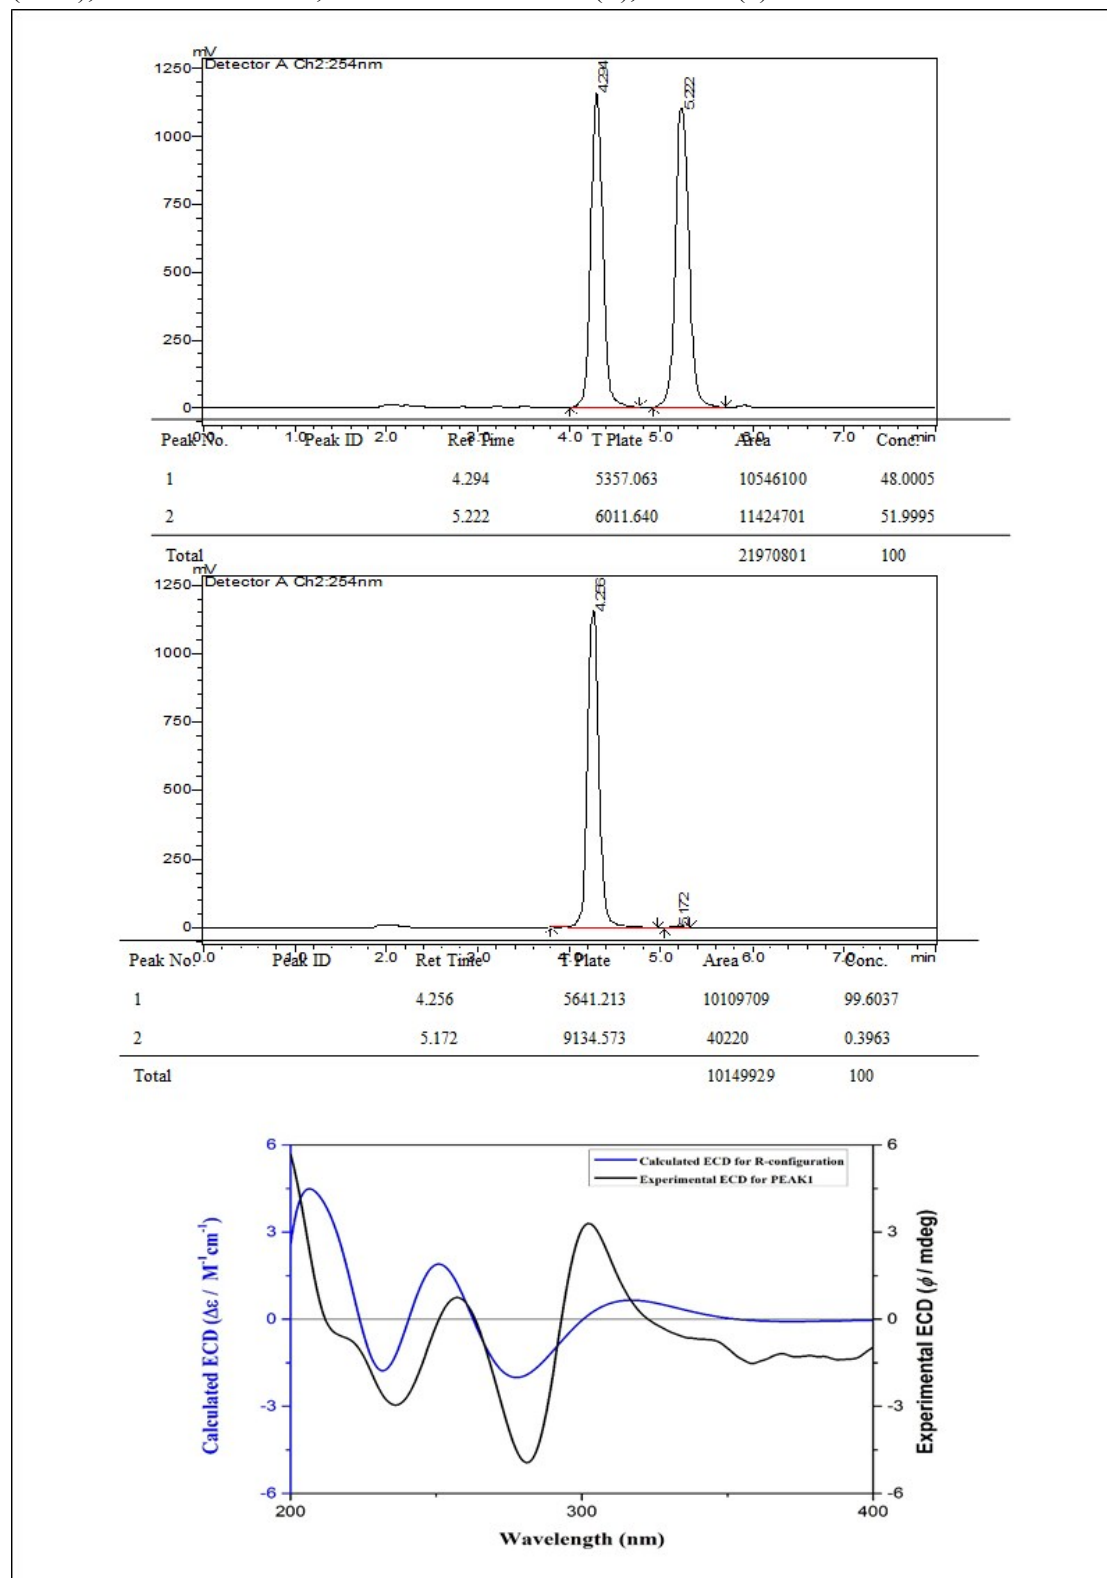

Supplement: c6ra04251a1.pdf [file c6ra04251a1.pdf]
